# Supplementary material for: Global evaluation of the nutrient-enabled version of the land surface model ORCHIDEE-CNP v1.2 (r5986)
Source: Copernicus journal article supplement (doi:10.5194/gmd-14-1987-2021), 2021-04-14
Supplement: Supplementary file [file gmd-14-1987-2021-supplement-title-page.pdf › gmd-14-1987-2021-supplement-title-page.pdf]

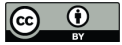

## *Supplement of*

# **Global evaluation of the nutrient-enabled version of the land surface model ORCHIDEE-CNP v1.2 (r5986)**

**Yan Sun et al.**

*Correspondence to:* Yan Sun (ysun@lsce.ipsl.fr) and Daniel S. Goll (dsgoll123@gmail.com)

- gmd-14-1987-2021-supplement-title-page.pdf
- \_\_MACOSX
  - supple\_GMD\_rev
    - \* .\_Supplementary\_GMD.docx
    - \* .\_Text S1.pdf
- supple\_GMD\_rev
  - Supplementary\_GMD.docx
  - Text S1.pdf

The copyright of individual parts of the supplement might differ from the article licence.
